# Supplementary material
Source: PubMed Central journal article supplement (PMC3686986)
Supplement: NIHMS440916-supplement-01.pdf [file NIHMS440916-supplement-01.pdf]

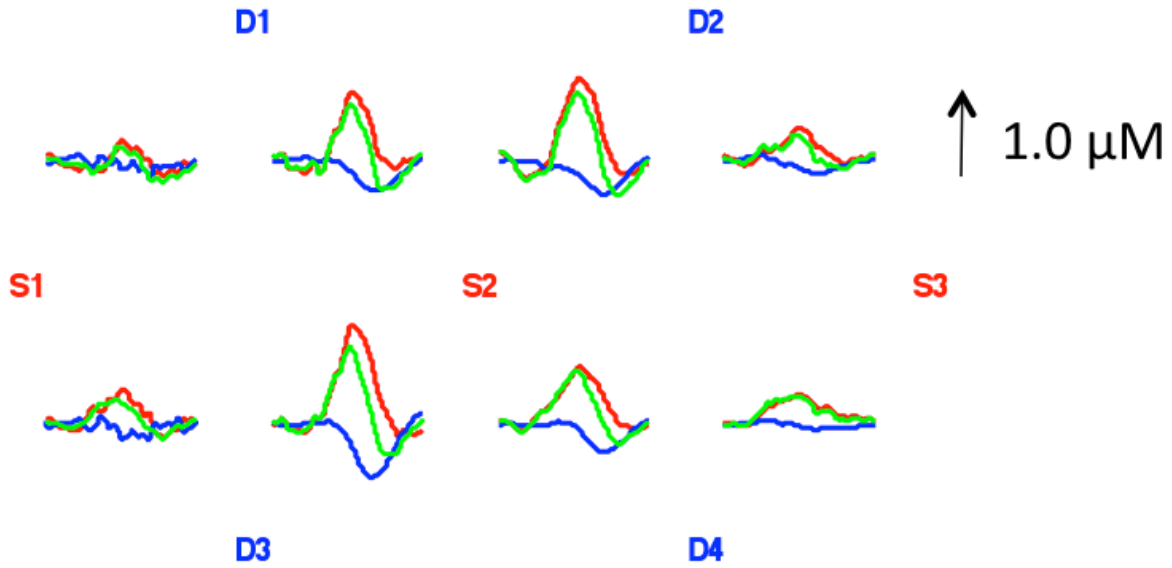

**Supplementary Fig. 1.** Average of the hemodynamic response obtained from 18 stimuli on subject 3 using CWNIRS. Source S2 is positioned over C3 in the 10-20 system. Red is HbO, blue is HbR, green is HbT.

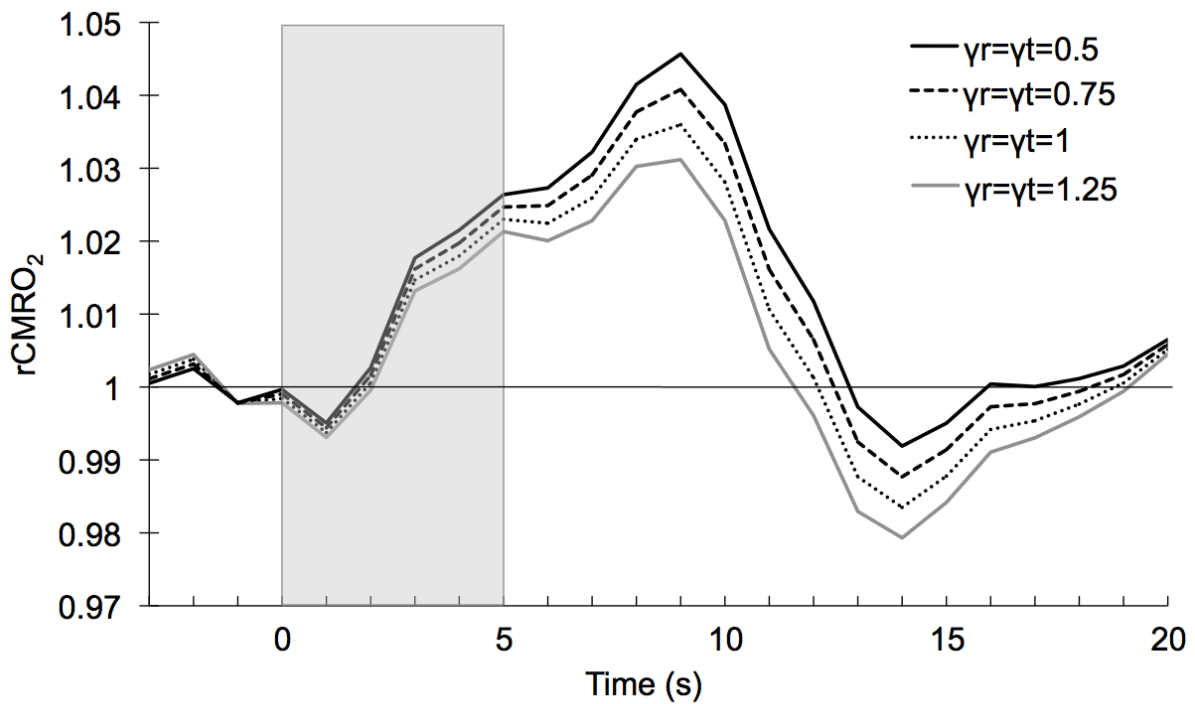

**Supplementary Fig. 2.**  $rCMRO_2$  calculated using equation (8) with different values of  $\gamma_r$  and  $\gamma_t$ .

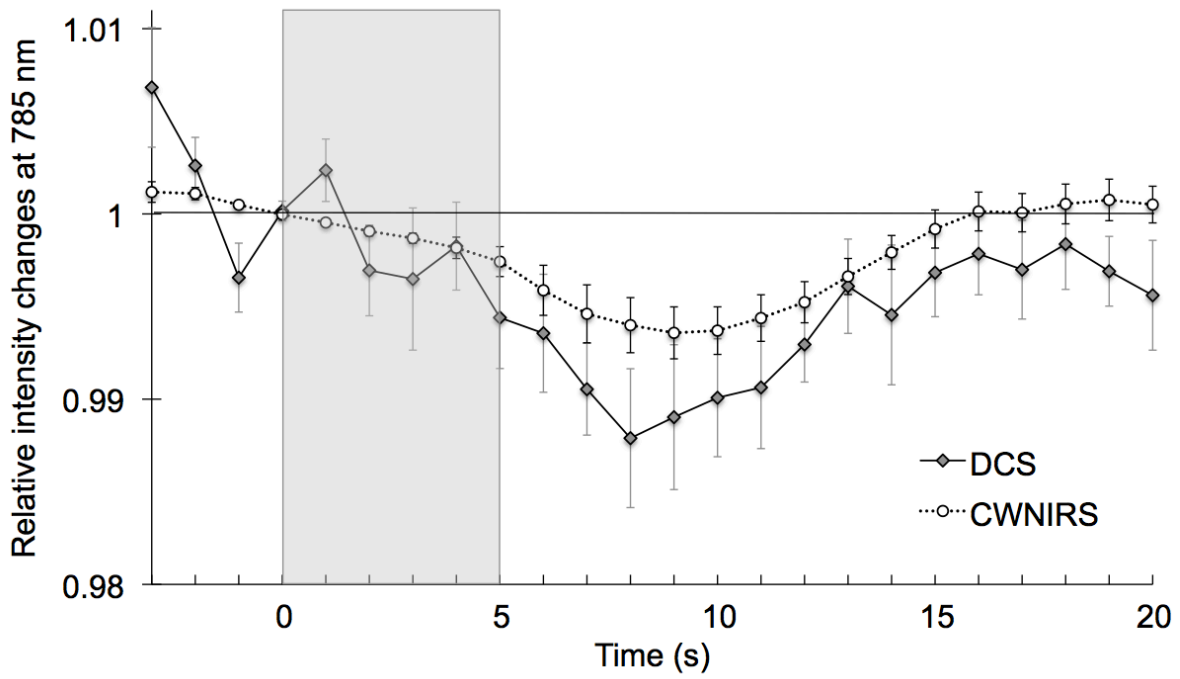

**Supplementary Fig. 3.** Grand average of relative changes in DCS intensity and CWNIRS intensity  $\pm$  standard error. Pearson's correlation coefficient  $r = 0.86$ .
